# Supplementary material for: Exploring the degradation pathways of a nickel-rich cathode during high-temperature storage in high-energy lithium-ion batteries
Source: Royal Society of Chemistry journal article supplement (doi:10.1039/d3ta01991h), 2023-01-01
Supplement: d3ta01991h1.pdf [file d3ta01991h1.pdf]

## Exploring Degradation Pathways of Nickel-rich Cathode During High-Temperature Storage in High-Energy Lithium-ion Batteries

Hyungyeon Cha<sup>a†</sup>, Jaeseong Hwang<sup>a</sup>, Taeyong Lee<sup>a</sup>, Jihyeon Kang, Minjoon Park<sup>b,\*</sup>, and Jaephil Cho<sup>a,\*</sup>

[a] Dr. H. Cha, Dr. J. Hwang, Dr. T. Lee, Prof. J. Cho

Department of Energy Engineering, School of Energy and Chemical Engineering,  
Ulsan National Institute of Science and Technology (UNIST), 50, UNIST-gil, Ulsan  
44919, Republic of Korea

<sup>†</sup>Current address : Energy Storage and Distributed Resources Division, Lawrence  
Berkeley National Laboratory, Berkeley, California 94720, United States

[b] J. Kang, Prof. M. Park

Department of Nanoenergy Engineering, Pusan National University, 50,  
Busandaehak-ro 63 beon-gil 2, Geumjeong-gu, Busan 46241, Republic of Korea  
Research Center of Energy Convergence Technology, Pusan National University,  
Busandaehak-ro 63beon-gil 2, Geumjeong-gu, Busan, 46241, Republic of Korea  
Department of Nano Fusion Technology, Pusan National University,  
Busandaehak-ro 63beon-gil 2, Geumjeong-gu, Busan, 46241, Republic of Korea

\*Corresponding author:mjpark@pusan.ac.kr, jpcho@unist.ac.kr

## Supporting Figures and Table

| Material selection                                                 |                                                                                                                           |                                                                    |
|--------------------------------------------------------------------|---------------------------------------------------------------------------------------------------------------------------|--------------------------------------------------------------------|
|                                                                    | Cathode                                                                                                                   | Anode                                                              |
| Active material                                                    | $\text{LiNi}_{0.88}\text{Co}_{0.1}\text{Al}_{0.02}\text{O}_2$<br>Specific capacity: 210 mAh g <sup>-1</sup> ,<br>ICE: 91% | Graphite<br>Specific capacity: 360 mAh g <sup>-1</sup><br>ICE: 92% |
| Conductive agent                                                   | Carbon black                                                                                                              | -                                                                  |
| Binder                                                             | Polyvinylidene fluoride (PVDF)                                                                                            | Styrene butadiene rubber (SBR) and carboxymethyl cellulose (CMC)   |
| Electrode engineering                                              |                                                                                                                           |                                                                    |
|                                                                    | Cathode                                                                                                                   | Anode                                                              |
| Electrode composition<br>(Active material:Binder:Conductive agent) | 96:02:02                                                                                                                  | 97:1.5:1.5                                                         |
| Loading level (mg cm <sup>-2</sup> )                               | 22.5                                                                                                                      | 14.2                                                               |
| N/P ratio                                                          | 1.3                                                                                                                       |                                                                    |
| Electrode density (g cc <sup>-1</sup> )                            | 3.6                                                                                                                       | 1.5                                                                |
| Full-cell assembly                                                 |                                                                                                                           |                                                                    |
| Cell structure                                                     | Stacking type pouch cell                                                                                                  |                                                                    |
|                                                                    | Cathode                                                                                                                   | Anode                                                              |
| Number of stacks                                                   | 2                                                                                                                         | 3                                                                  |
| Cell dimension                                                     | 68.5 mm*50 mm                                                                                                             | 72.5 mm*54 mm                                                      |
| Cell capacity                                                      | 0.7 Ah                                                                                                                    |                                                                    |

**Table S1.** Detailed information for the full-cell.

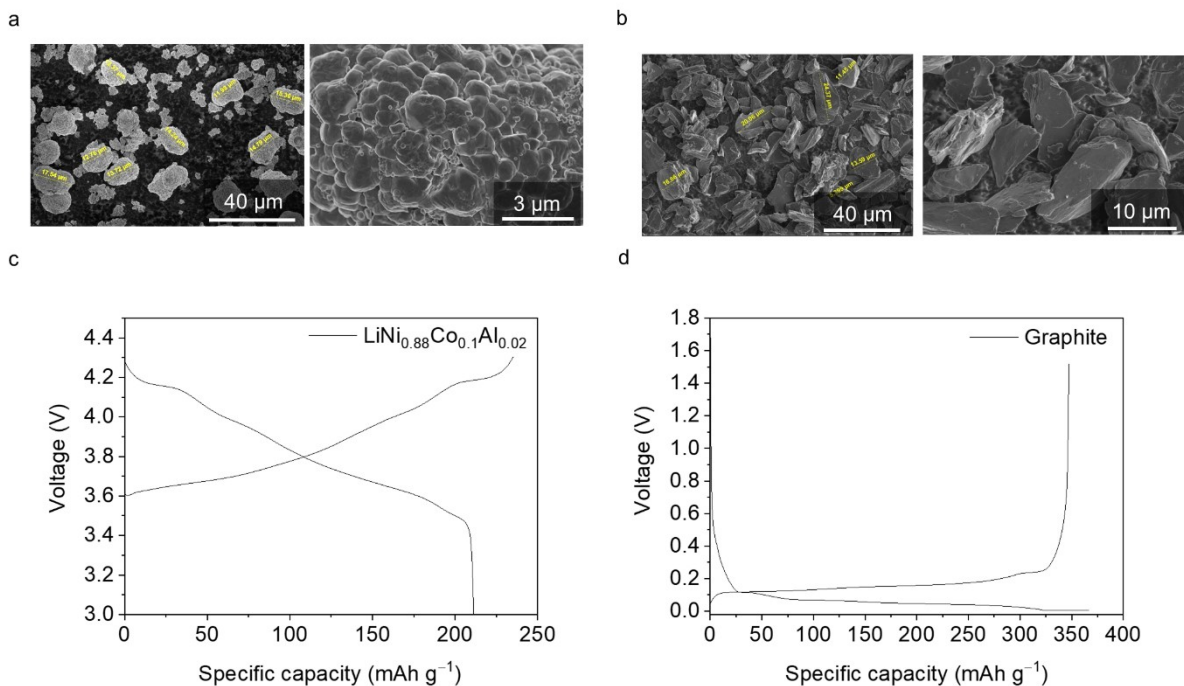

**Fig. S1.** SEM images of (a)  $\text{LiNi}_{0.88}\text{Co}_{0.1}\text{Al}_{0.02}\text{O}_2$  and (b) graphite. Voltage profiles of formation step for (c)  $\text{LiNi}_{0.88}\text{Co}_{0.1}\text{Al}_{0.02}\text{O}_2$  cathode at voltage range of 3.0 V - 4.3 V at 0.1C-rate and (d) graphite anode at voltage range of 0.005 V - 1.5 V at 0.1C-rate.

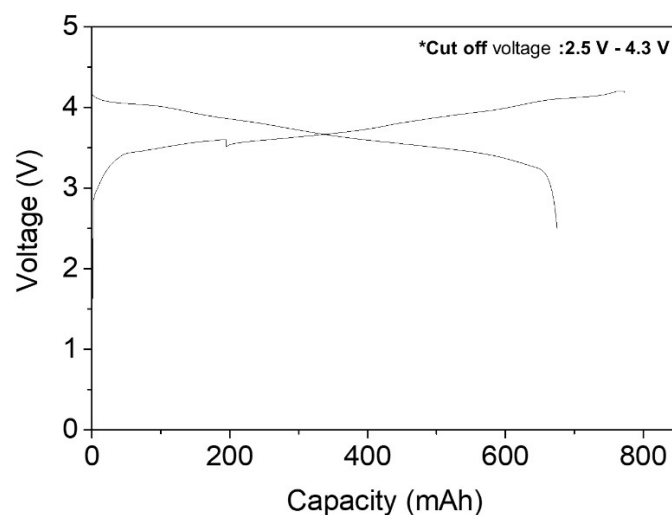

| Charge capacity | Discharge capacity | Initial Coulombic Efficiency |
|-----------------|--------------------|------------------------------|
| 772 mAh         | 675 mAh            | 87.4 %                       |

**Fig. S2.** Voltage profile of  $\text{LiNi}_{0.88}\text{Co}_{0.1}\text{Al}_{0.02}\text{O}_2/\text{Graphite}$  full-cell at voltage range of 2.5 V – 4.2 V at 0.1C-rate.

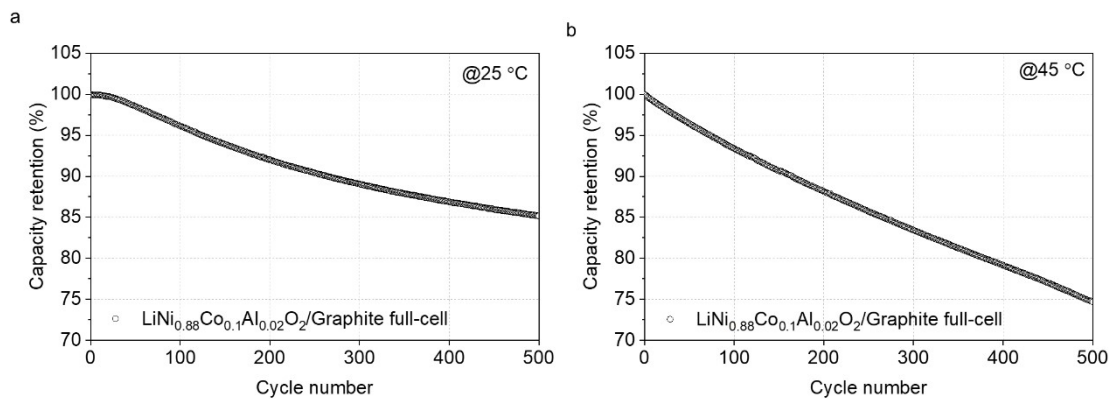

**Fig. S3.** Cycle performance of  $\text{LiNi}_{0.88}\text{Co}_{0.1}\text{Al}_{0.02}\text{O}_2/\text{Graphite}$  full-cell at voltage range of 2.5 V – 4.2 V at 1C-rate at (a) room temperature (25 °C) and (b) 45 °C.

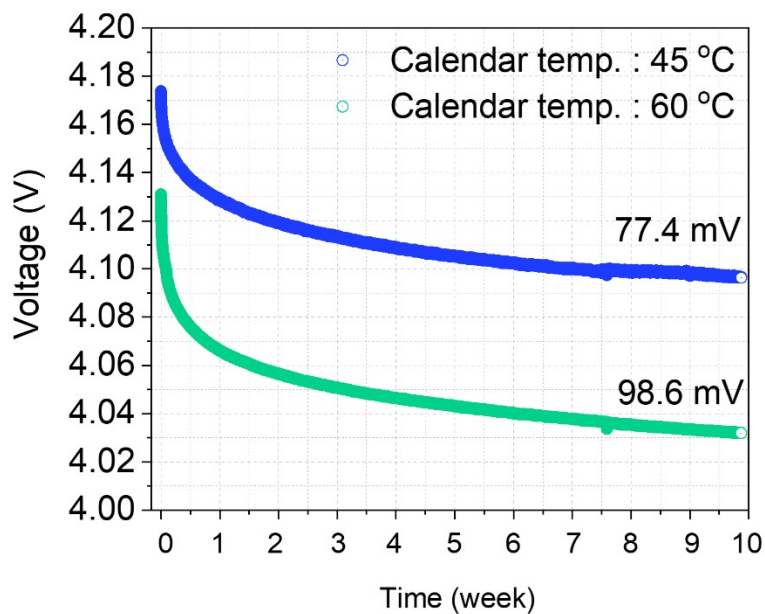

**Fig. S4.** Self-discharge during calendar life test at 45 °C and 60 °C

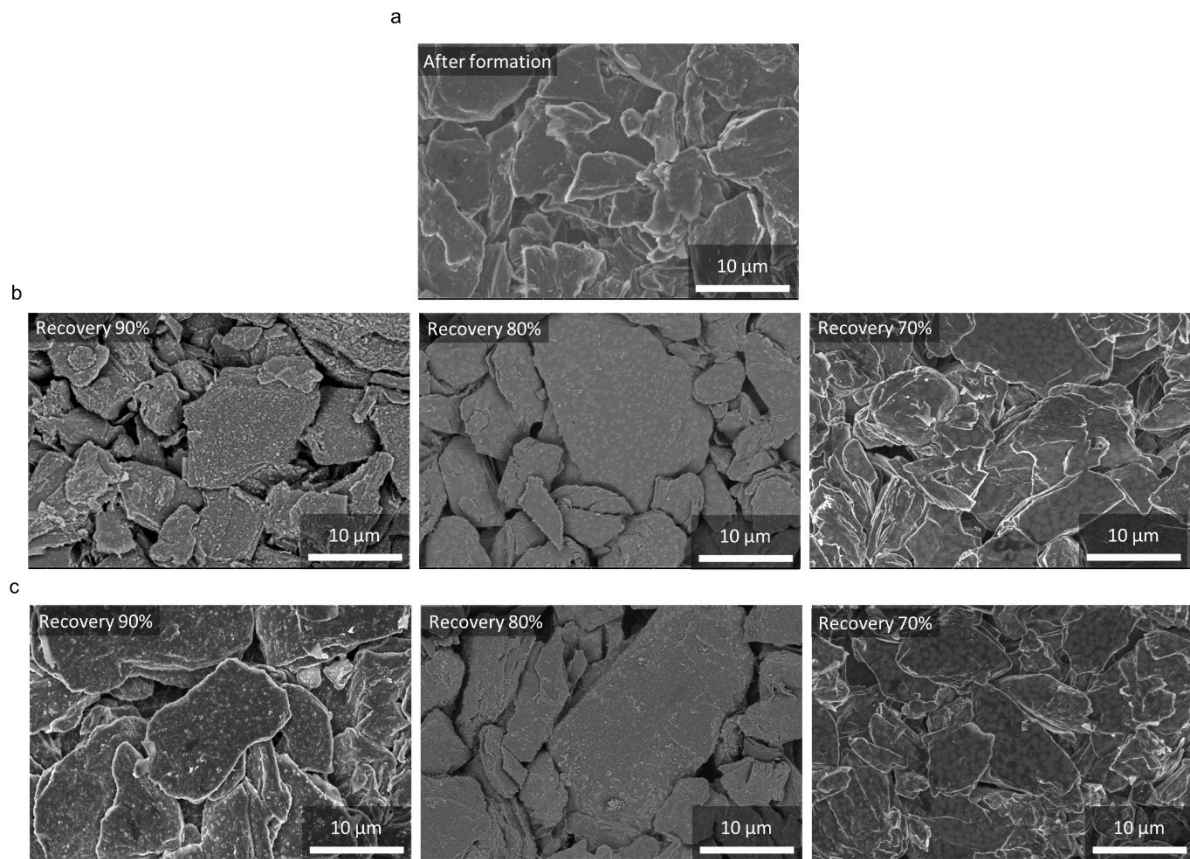

**Fig. S5.** (a) SEM images graphite anodes after formation. SEM images of graphite anodes of the full-cell with recovery 90%, 80% and 70% stored at (b) 45 °C and (c) 60 °C.

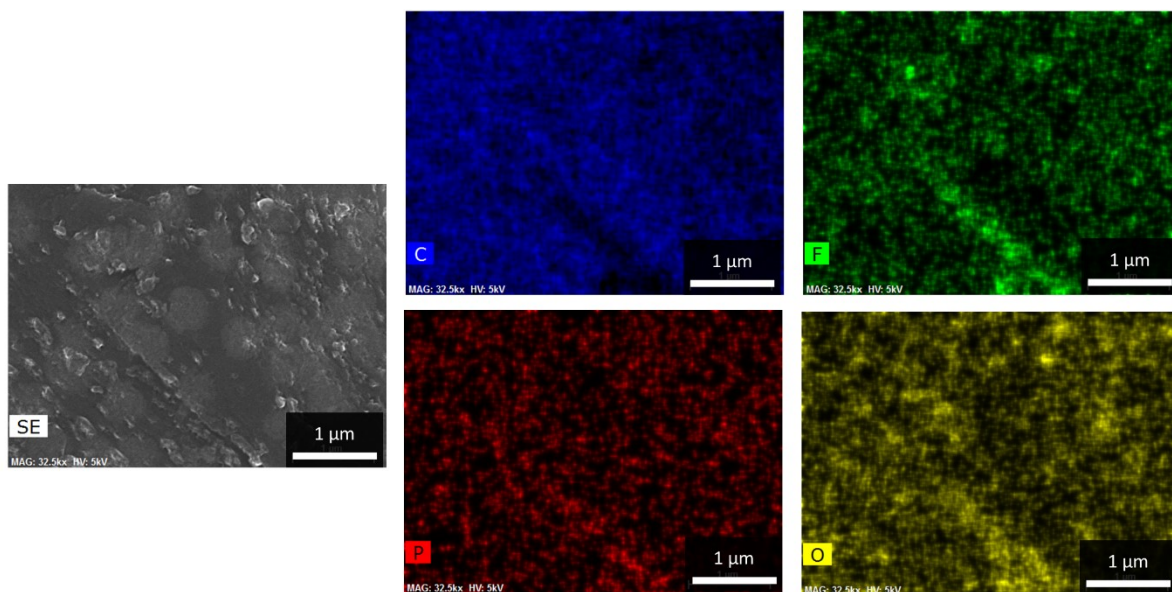

**Fig. S6.** (a) EDX mapping images of graphite surface, showing capacity retention of 70% after storing at 60 °C.

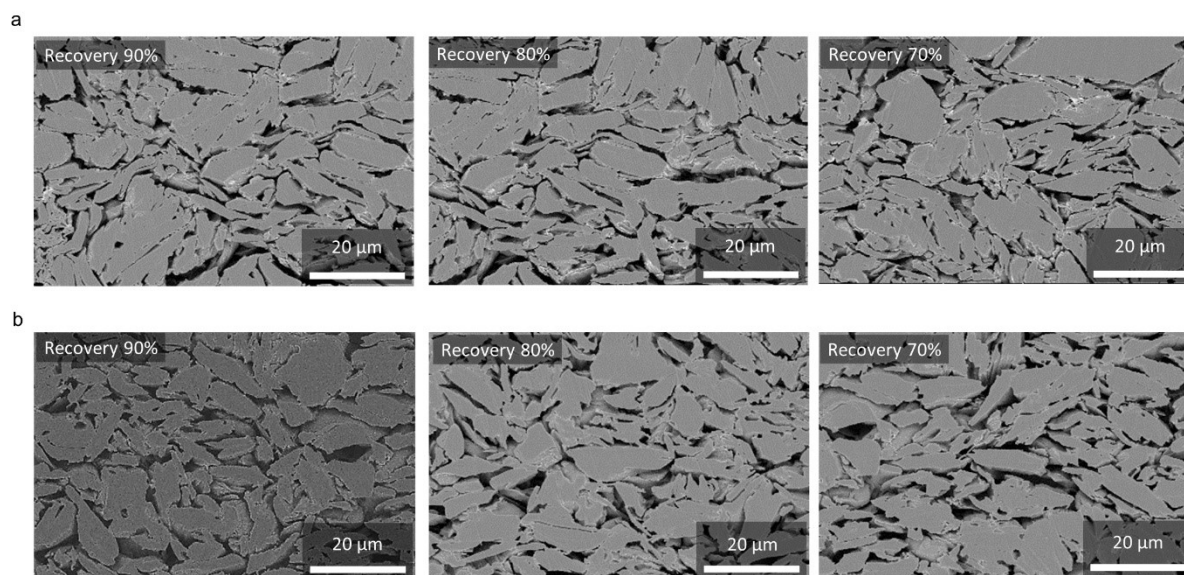

**Fig. S7.** Cross-section SEM images of graphite anodes of the full-cell with recovery 90%, 80% and 70% stored at (a) 45 °C and (b) 60 °C.



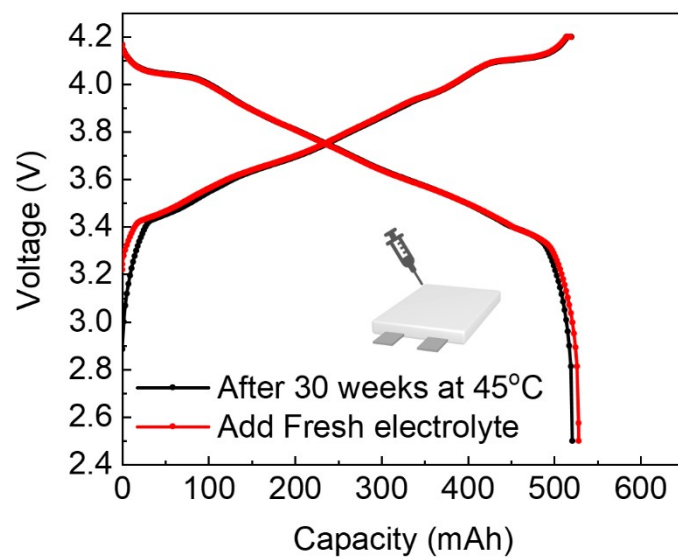

**Fig. S8.** Voltage profiles of full-cells after 30 weeks stored at 45 °C and after adding 1 mL of electrolyte

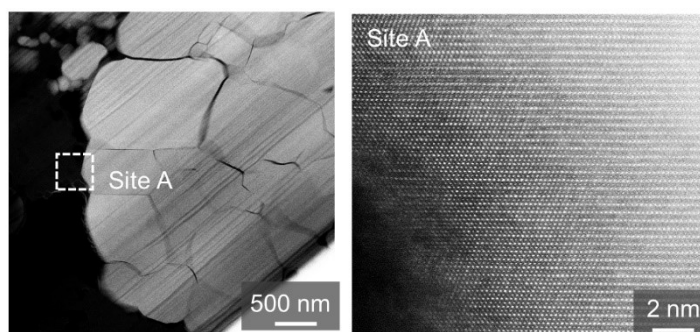

**Fig. S9.** HR-TEM images of  $\text{LiNi}_{0.88}\text{Co}_{0.1}\text{Al}_{0.02}\text{O}_2$  particle after storage at 60 °C for 10 weeks

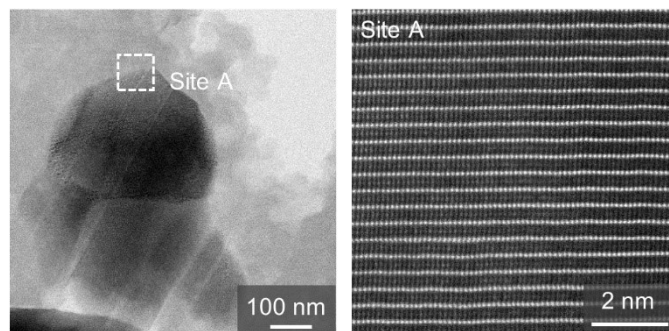

**Fig. S10.** HR-TEM images of  $\text{LiNi}_{0.88}\text{Co}_{0.1}\text{Al}_{0.02}\text{O}_2$  particle before storage
